# The Multispecies Coalescent in Space and Time

Patrick F. McKenzie<sup>1</sup> and Deren A. R. Eaton<sup>1</sup>

<sup>1</sup> Department of Ecology, Evolution, and Environmental Biology, Columbia University

## Abstract–

A key distinction between species tree inference under the multi-species coalescent model (MSC), and the inference of gene trees in sliding windows along a genome, is in the effect of genetic linkage. Whereas the MSC explicitly assumes genealogies to be unlinked, i.e., statistically independent, genealogies located close together on genomes are spatially auto-correlated. Here we use tree sequence simulations with recombination to explore the effects of species tree parameters on spatial patterns of linkage among genealogies. We decompose coalescent time units to demonstrate differential effects of generation time and effective population size on spatial coalescent patterns, and we define a new metric, "phylogenetic linkage," for measuring the rate of decay of phylogenetic similarity by comparison to distances among unlinked genealogies. Finally, we provide a simple example where accounting for phylogenetic linkage in sliding window analyses improves local gene tree inference.

## 0.1 Introduction–

The multispecies coalescent (MSC) is a model for inferring a phylogenetic tree from a distribution of sampled genealogies – or in practice, a distribution of empirical gene trees inferred from multi-locus genetic data (Maddison, 1997; Maddison & Knowles, 2006; Degnan & Rosenberg, 2009). By integrating over genealogical variation the MSC improves estimation of both tree topologies and divergence times, in addition to providing estimates of other demographic parameters of interest, such as population sizes (Edwards & Beerli, 2000; Fang *et al.*, 2020). Its influence on phylogenetics has been broad and pervasive, as is evident in the many extensions that have been developed for incorporating the MSC into studies of gene duplication and loss (Rasmussen & Kellis, 2012), introgression (Yu *et al.*, 2011), and even character evolution (Guerrero & Hahn, 2018). As we approach one decade since the publication of the first volume of *Estimating Species Trees* (Knowles & Kubatko, 2011) it is valuable to re-examine the MSC, and its assumptions, to ask how we can best approach new challenges and opportunities in the coming era of ubiquitous whole genome data sets. One area where we believe the MSC has great potential is in improving the inference of local genealogical variation across whole genomes.

A key distinction between species tree inference under the MSC and the inference of genealogies sequentially distributed across genomes is the effect of genetic linkage. The MSC explicitly assumes that genealogies are unlinked, i.e., statistically independent, whereas genealogies distributed across a contiguous genomic region are not independent, and are expected to be spatially auto-correlated. This correlation (linkage disequilibrium) decays over time as recombination causes samples within different genomic regions to trace back to different sampled ancestors (Hudson & Kaplan, 1988). While this decay function has been well studied in the context of single populations (McVean & Cardin, 2005), its effect on the similarity of genealogies constrained by a species tree model is poorly understood, including the influence of species tree parameters. Recent algorithmic advances have now made it possible to efficiently simulate entire chromosomes with recombination to produce correlated tree sequences (Kelleher *et al.*, 2016), which presents a powerful new opportunity to investigate the relationship between species tree parameters and sequential genealogical patterns across genomes.

Genome-wide phylogenetic inference is currently approached from two methodological extremes: either (1) a single species tree is inferred as a hierarchical model to describe the expected distribution of unlinked genealogies across the genome; or (2) no hierarchical model is assumed, and gene trees are inferred

44 independently in sliding windows of concatenated sequences along the genome (Martin & Belleghem,  
45 2017). The latter approach is often applied to identify introgressed regions based on their deviation from  
46 a genome-wide average (Wang *et al.*, 2019). However, the dearth of information contained within small  
47 genomic windows can cause high gene tree estimation error in this approach, and similarly, increasing  
48 window size to be too large will cause errors from concatenation of multiple distinct histories. The MSC  
49 provides a potential path forward. A parameterized species tree inferred from unlinked locus data may be  
50 able to provide priors on the expected distribution of genealogies both globally across the genome, as well  
51 as spatially among linked trees.

52 In this chapter we explore this concept by using simulations to estimate the effect of species tree pa-  
53 rameters on the rate of decay of phylogenetic similarity across the spatial extent of a chromosome with a  
54 uniform recombination rate. We show that a decay function can be estimated to describe the spatial auto-  
55 correlation of genealogies, and that by incorporating this function into gene tree inference, accuracy can be  
56 significantly improved compared to existing sliding window methods.

## 57 0.2 Coalescent simulations

58 To investigate genealogical variation along chromosomes we simulated genealogies under a range of species  
59 tree models in Python using the *ipcoal* package (McKenzie & Eaton, 2020). This takes as input a tree  
60 topology and demographic parameters (divergence times, effective population sizes, mutation rate, and  
61 recombination rate) to generate a parameterized simulator for the program *msprime* (Kelleher *et al.*, 2016).  
62 Using this model we then simulated coalescent genealogies constrained by a species tree topology. To gen-  
63 erate linked trees we simulated a 1Mb chromosome and recorded the true genealogy spanning each posi-  
64 tion of its length, since different genealogies span different intervals along the chromosome between re-  
65 combination crossover locations. To generate unlinked trees we simulated 1000 independent loci of length  
66 one and stored the single observed genealogy from each locus. Species trees and genealogies were plotted  
67 and manipulated using the Python package *toytree* (Eaton, 2020). Annotated code to reproduce all analy-  
68 ses in this chapter is organized into jupyter notebooks and available at [https://github.com/eaton-lab/sptree-](https://github.com/eaton-lab/sptree-chapter)  
69 chapter.

70 The distributions of linked and unlinked genealogies simulated on the same species tree are easy to  
71 distinguish when visualized: linked genealogies exhibit significant auto-correlation whereas unlinked ge-  
72 nealogies exhibit greater variation (Fig. 1c-d). We explored a range of parameters to realistically describe  
73 linked and unlinked genealogical variation in genome-wide phylogenetic data sets. To focus our analyses  
74 on fewer total parameters we performed all simulations on completely imbalanced tree shapes (but differ-  
75 ent tree sizes) in which internode lengths and effective population sizes of internal edges are all set to be  
76 equal. All simulations were performed using a per-site per-generation recombination rate of  $1e-9$ , and in  
77 the case when sequence data was generated, a per-site per-generation mutation rate of  $1e-8$  applied under  
78 the JC69 substitution model. The parameters we investigated for their effect on the distribution of genealo-  
79 gies include tree size (number of tips), the probability of incongruence (internode edge lengths in coales-  
80 cent units), and tree height (the number of generations between internodes).

### 81 0.2.1 Units, space, and time

82 The effect of time, measured in units of generations, is not typically of interest for studies of the MSC,  
83 since the probability of incongruence (among unlinked genealogies) can be explained entirely by internode  
84 lengths measured in coalescent units ( $t_c$ ), which is calculated as  $t_c = t_g/2N_e$ , where  $t_g$  is time in genera-  
85 tions and  $N_e$  is the effective population size. Because  $t_c$  is a ratio of time and population size, the absolute  
86 value of  $t_g$  has not been of interest, only its relation to  $N_e$  (Fig. 1a-b). However, in the context of a sequen-  
87 tial coalescent process it turns out that  $t_g$  does matter, since recombination is modeled as a per-generation

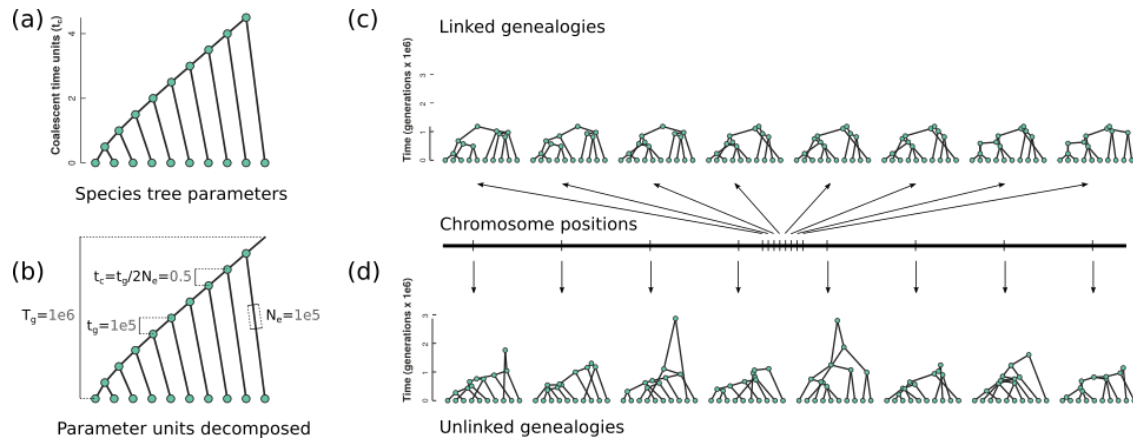

Figure 1. The effect of genetic linkage on the spatial distribution of genealogies across a chromosome. (a) A species tree topology with edge lengths in coalescent units can fully describe the probability of incongruence among unlinked genealogies. (b) Coalescent units ( $t_c$ ) are a composite of time in generations ( $t_g$ ) and the effective populations size ( $N_e$ ). The extent of linkage among genealogies is influenced by both  $t_g$  and  $N_e$ , and thus not fully explained by  $t_c$  alone. (c-d) Genealogies are plotted with tips in the same order as the species tree topology to highlight incongruence. Arrows indicate the positions of genealogies on a chromosome; linked genealogies are close together and unlinked genealogies are far apart. (c) Linked genealogies are spatially correlated because many samples share the same ancestors until a recombination event occurs. (d) Unlinked genealogies are independent and exhibit greater variation among a sampled set than linked genealogies.

88 process, and so both  $t_g$  and  $N_e$  affect the number of recombination events, and thus the similarity of neigh-  
 89 boring genealogies.

90 The effect of time in units of generations is demonstrated in Table 1. Here we simulated linked and un-  
 91 linked genealogies on the same species trees and over a range of parameters. In each data set we measured  
 92 the average Robinson-Foulds (RF) distance between all pairwise unlinked genealogies, and in the case  
 93 of linked trees, between 1000 pairs of genealogies randomly sampled from positions that are spaced 5Kb  
 94 apart. RF distances are reported here using normalized (scaled) values to account for differences in tree  
 95 size, but non-normalized RF distances show the same qualitative results (not shown). In the unlinked data  
 96 sets  $t_g$  has no effect on the similarity of genealogies – only  $t_c$  is relevant – as has been traditionally recog-  
 97 nized in the MSC. However, for linked genealogies  $t_g$  has a large effect. When edge lengths are longer in  
 98 units of generations, and  $N_e$  is similarly scaled to retain the same probability of incongruence ( $t_c$ ), the size  
 99 of non-recombined blocks becomes smaller, and the average RF distance between neighboring genealogies  
 100 is greater.

101 A notable result of these simulations is the observation that the size of non-recombined genomic blocks  
 102 becomes very small in certain regions of parameter space, particularly when the internode lengths in units  
 103 of generations are very long. This is troubling for the MSC which requires that loci represent a single ge-  
 104 nealogical history as opposed to multiple concatenated genealogies. The impact of recombination within  
 105 loci has been investigated previously, both in the first edition of this book (Castillo-Ramirez *et al.*, 2010),  
 106 as well as in a series of critical examinations of the impact of "concatalescence" (Springer & Gatesy, 2016).  
 107 At issue is whether gene tree estimation error is elevated when concatenating data from multiple genealo-  
 108 gies into a single locus. The results from our simulations suggest there are some regions of parameter  
 109 space where the size of non-recombined blocks becomes quite small, and so this issue may warrant fur-  
 110 ther examination. In this paper, however, rather than examine recombination and its effects as a critique on

111 existing MSC approaches, we aim instead to explore how linkage among recombined genealogical blocks  
112 of the genome can possibly be a useful source of information when analyzing whole genomes.

## 113 **0.2.2 Tree size, tree space, and phylogenetic decay**

114 The enormous size of phylogenetic tree space is a constant source of computational burden in phyloge-  
115 netics, but intriguingly, it may actually provide a source of information in the context of the sequential  
116 coalescent process. This is because as the size of tree space grows in larger data sets so too does the ex-  
117 pected RF distance between any two random unlinked genealogies. This is particularly true when  $t_c$  is very  
118 small, such that all coalescent events occur deeper than the root of the species tree. In this case the topol-  
119 ogy of unlinked genealogies is hardly constrained by the species tree at all, and almost any genealogy can  
120 be observed. However, adjacent genealogies on the same chromosome are still expected to share signifi-  
121 cant similarity, since few recombination events are likely to have occurred between them. Consequently,  
122 the degree to which linked genealogies are more similar to each other, *relative* to the similarity among un-  
123 linked genealogies, is a function of parameters of the species tree, including the tree size.

124 This type of relative measurement provides a means to develop a statistic to describe the rate of decay  
125 of spatial auto-correlation in genealogies across a genome. We propose the term "phylogenetic linkage"  
126 ( $PL$ ) to describe the ratio of RF distances among linked genealogies separated by some genetic distance in  
127 the genome relative to the average RF distance among unlinked genealogies.

$$PL(d) = 1 - (RF(d)_{linked}/RF_{unlinked})$$

128 In other words, if two genealogies spaced  $d$  distance apart on a chromosome are as different from each  
129 other as two randomly sampled unlinked genealogies are on average, then they are effectively unlinked.  
130 By measuring phylogenetic linkage at increasing genetic distances between genealogies we can infer a rate  
131 of decay of phylogenetic linkage across the genome. For each simulated data set we then fit an exponen-  
132 tial decay function using the *scipy* package in Python. From the estimated decay rate parameter ( $\lambda_d$ ) we  
133 estimated a phylogenetic linkage half-life, representing the distance in bp at which two genealogies are  
134 expected to lose half of their phylogenetic linkage (Table 1; Fig. 2).

135 When  $t_g$  is larger, phylogenetic decay occurs faster, since more recombination events are possible over  
136 each internal edge of the tree (e.g., compare rows 0 and 7 in Table 1). Similarly, when  $N_e$  is greater, re-  
137 combination events are more likely to cause a change in the topology, and thus phylogenetic linkage de-  
138 cays faster (e.g., compare rows 0, 3, and 6 in Table 1). Finally, when the total tree size (Ntips) is greater,  
139 the decay of linkage occurs more slowly, since the average difference between unlinked genealogies is  
140 greater, and thus it takes longer for sufficient spatial information to decay to approach the unlinked mean  
141 RF distance (e.g., compare rows 0, 9, and 18 in Table 1).

## 142 **0.3 Linked genealogies and gene tree inference**

143 Unlike in simulations, the true genealogical history for any region of the genome is an unknown and un-  
144 observable variable. It is something we must infer based on the signal left by the mutational process. So  
145 how can our understanding of the decay of phylogenetic linkage be useful in the context of gene tree infer-  
146 ence? One way to approach this problem is to ask what is the expected length over which a site supporting  
147 a bipartition in one position of the genome continues to be true in neighboring regions of the genome?

148 The standard sliding window approach gives equal weight to all sites within an alignment window. An  
149 alternative approach could be to extend the size of the window to ensure that there is sufficient information  
150 to infer a resolved gene tree, but to apply variable weights to sites in the alignment such that those near  
151 the center of the window have greatest weight, and can override alternative signals (Fig. 3a). This has the  
152 effect that if no local information exists to support the true local genealogy then data from more distant

|    | Ntips | $T_g$ | $t_c$ | $t_g$ | $N_e$   | block-size | $RF_{unlinked}$ | $RF_{linked-5K}$ | half-life |
|----|-------|-------|-------|-------|---------|------------|-----------------|------------------|-----------|
| 0  | 10    | 1e5   | 0.2   | 1e4   | 25000   | 1706       | 0.40            | 0.19             | 6576      |
| 1  | 10    | 1e6   | 0.2   | 1e5   | 250000  | 174        | 0.40            | 0.40             | 607       |
| 2  | 10    | 1e7   | 0.2   | 1e6   | 2500000 | 18         | 0.40            | 0.40             | 67        |
| 3  | 10    | 1e5   | 1.0   | 1e4   | 5000    | 4761       | 0.22            | 0.05             | 16715     |
| 4  | 10    | 1e6   | 1.0   | 1e5   | 50000   | 525        | 0.22            | 0.15             | 2359      |
| 5  | 10    | 1e7   | 1.0   | 1e6   | 500000  | 56         | 0.22            | 0.20             | 270       |
| 6  | 10    | 1e5   | 2.0   | 1e4   | 2500    | 8849       | 0.08            | 0.01             | 22627     |
| 7  | 10    | 1e6   | 2.0   | 1e5   | 25000   | 906        | 0.08            | 0.05             | 4659      |
| 8  | 10    | 1e7   | 2.0   | 1e6   | 250000  | 93         | 0.08            | 0.08             | 443       |
| 9  | 50    | 1e5   | 0.2   | 2e3   | 5000    | 1485       | 0.47            | 0.13             | 15890     |
| 10 | 50    | 1e6   | 0.2   | 2e4   | 50000   | 149        | 0.47            | 0.39             | 1838      |
| 11 | 50    | 1e7   | 0.2   | 2e5   | 500000  | 15         | 0.47            | 0.47             | 185       |
| 12 | 50    | 1e5   | 1.0   | 2e3   | 1000    | 4830       | 0.24            | 0.01             | 84731     |
| 13 | 50    | 1e6   | 1.0   | 2e4   | 10000   | 509        | 0.24            | 0.09             | 11884     |
| 14 | 50    | 1e7   | 1.0   | 2e5   | 100000  | 51         | 0.24            | 0.22             | 1233      |
| 15 | 50    | 1e5   | 2.0   | 2e3   | 500     | 9900       | 0.09            | 0.00             | 124415    |
| 16 | 50    | 1e6   | 2.0   | 2e4   | 5000    | 866        | 0.09            | 0.02             | 23019     |
| 17 | 50    | 1e7   | 2.0   | 2e5   | 50000   | 87         | 0.09            | 0.08             | 2048      |
| 18 | 100   | 1e5   | 0.2   | 1e3   | 2500    | 1345       | 0.47            | 0.08             | 26873     |
| 19 | 100   | 1e6   | 0.2   | 1e4   | 25000   | 138        | 0.47            | 0.34             | 3128      |
| 20 | 100   | 1e7   | 0.2   | 1e5   | 250000  | 14         | 0.47            | 0.47             | 345       |
| 21 | 100   | 1e5   | 1.0   | 1e3   | 500     | 5405       | 0.24            | 0.01             | 178444    |
| 22 | 100   | 1e6   | 1.0   | 1e4   | 5000    | 474        | 0.24            | 0.05             | 22688     |
| 23 | 100   | 1e7   | 1.0   | 1e5   | 50000   | 51         | 0.24            | 0.19             | 2499      |
| 24 | 100   | 1e5   | 2.0   | 1e3   | 250     | 7299       | 0.09            | 0.00             | 218558    |
| 25 | 100   | 1e6   | 2.0   | 1e4   | 2500    | 877        | 0.09            | 0.01             | 39616     |
| 26 | 100   | 1e7   | 2.0   | 1e5   | 25000   | 85         | 0.09            | 0.06             | 4169      |

Table 1. Parameter settings used in simulations to examine the distribution of linked versus unlinked genealogies generated on the same species tree. All simulations were performed on an imbalanced species tree with uniform internode edge lengths. Three free parameters were explored: the number of tips (Ntips) on the tree, total tree height in generations ( $T_g$ ), and internode edge lengths in coalescent units ( $t_c$ ). Two additional parameters are shown for which values were determined entirely by values of the free parameters: the internode length in units of generations ( $t_g$ ) is determined by  $T_g$  and Ntips, and effective population size ( $N_e$ ) is determined by  $t_c$  and  $t_g$ . Results are reported as the mean values calculated from 1000 simulated genealogies. The size of non-recombined genomic blocks (block-size) decreases with time in generations. This affects the RF distance between linked genealogies, but not unlinked genealogies.  $RF_{linked-5K}$  is the RF distances among linked trees separated by 5Kb on a chromosome. The phylogenetic half-life was calculated from fitting an exponential curve to the rate of decay of phylogenetic linkage.



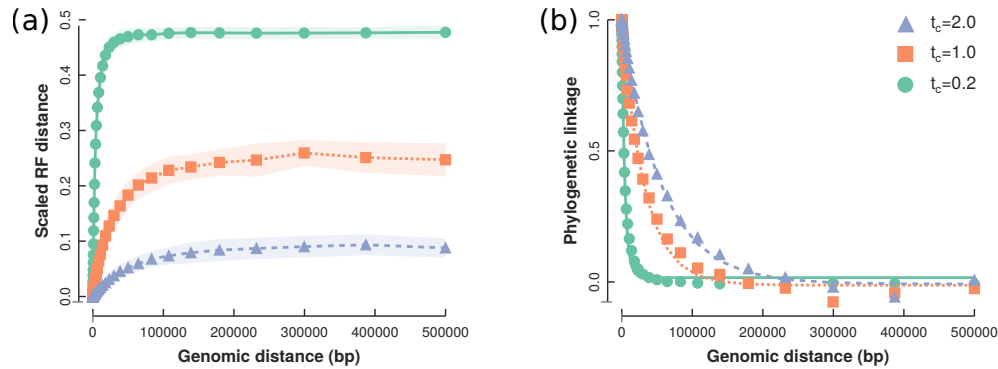

Figure 2. The RF distance between genealogies separated spatially on a chromosome plateaus as linkage decays by recombination, and approaches the average RF distance between unlinked genealogies (a). The ratio of RF distances between linked and unlinked genealogies (phylogenetic linkage) measured at different genetic distances approximates an exponential decay function (b). Results are shown for data simulated on a 100 tip species tree with total tree height of  $T_g = 1e6$  generations, and  $N_e$  of  $2.5e4$ ,  $5e4$ , or  $2.5e3$ , corresponding to edge lengths in coalescent units ( $t_c$ ) of 0.2, 1.0, and 2.0, respectively.

153 regions can inform that part of the tree, but with decreasing weight as their probability of representing the  
154 same genealogy decays with distance.

155 We implemented a weighted approach to local gene tree inference by using the "-a" weights file argu-  
156 ment during maximum likelihood tree estimation in RAxML v.8.2.12 (Stamatakis, 2014). A distribution  
157 of site weights was generated to give exponentially decreasing weight to sites on either side of a central  
158 position. For computational efficiency we cut off the window size to the left and right of the center at sites  
159 where the weight reached 1/10000 of the center given the exponential decay rate parameter estimated for  
160 that data set.

161 Decay-weighted gene tree inference was compared to traditional windows with uniform (no) weights.  
162 Gene trees were inferred at 50 positions spaced evenly across a 1Mb simulated chromosome. At each po-  
163 sition the RF distance between the true genealogy and the inferred gene tree was recorded to measure gene  
164 tree estimation accuracy. We tested uniform windows of lengths 1Kb, 2.5Kb, 10Kb, 25Kb, 100Kb, and  
165 1Mb, the last of which represents the total concatenated chromosome gene tree. Decay-function weighted  
166 gene trees were estimated in windows with a size determined by the decay rate, and we additionally tested  
167 decay rates with 2X, 5X and 10X faster rates to examine sensitivity to rate estimation. We show results for  
168 simulations performed on data set 10 from Table 1, which was selected for its fast rate of decay and high  
169 incongruence so that many distinct genealogies would be observed across the chromosome.

170 The decay-function weighted windows inferred more accurate gene trees on average than uniform  
171 windows (Fig. 3b-c). Of the uniform windows, the largest size (representing concatenation of the entire  
172 chromosome) performed the worst, while the best window size appears to be near 2.5Kb. All four decay-  
173 function weighted window sizes tested had lower mean RF scores (greater accuracy) than the best scoring  
174 uniform window. The best estimate was observed for the 5X decay rate window, which had a mean scaled  
175 RF distance of only 0.18, making it more than twice as accurate as the genome-wide concatenation gene  
176 tree. In non-scaled RF scores this represents an average of 35 differences from the true genealogy com-  
177 pared to 43 differences in the 2.5Kb uniform windows, 51 in 10Kb windows, and 80 in the concatenation  
178 gene tree. The reason a 5X decay rate performed better than the estimated decay rate may be caused by  
179 the cut off to weighted window sizes that we implemented to improve run times. Additional parameters  
180 that we did not explore here, such as the mutation rate and recombination rate, are likely to be important

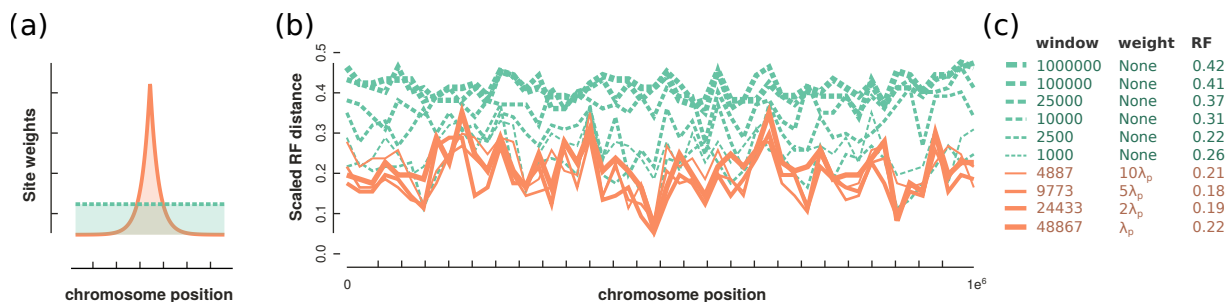

Figure 3. The accuracy of gene tree inference in sliding windows along a chromosome. (a) We compared windows that were of a fixed length and with uniform site weights to windows with lengths and weights determined by a function of exponentially decaying phylogenetic linkage inferred from simulations under the species tree parameters. (b) The scaled RF distance between inferred gene trees and the true simulated genealogy at 50 positions across a genome measured with different window sizes and weightings. (c) Windows with uniform (no) weights inferred less accurate gene trees than those with weights distributed by a phylogenetic decay-function, as measured by the mean scaled RF distance to the true simulated genealogies.

181 factors as well, since they affect the information content within each non-recombined genomic block.

## 182 Conclusions

183 For over a decade the goal of phylogenomic analyses has primarily focused on inferring a single species  
 184 tree to represent the distribution of genealogical variation across the entire genome. However, as whole  
 185 genome data becomes available there is increasing interest in the spatial distribution of genealogies at spe-  
 186 cific locations across the genome. This type of local ancestry information can be useful for testing evolu-  
 187 tionary questions about patterns of hemiplasy versus convergence (Guerrero & Hahn, 2018), for identify-  
 188 ing introgressed regions (Fang *et al.*, 2020), and testing hypotheses about adaptation (Martin *et al.*, 2019).  
 189 Despite the development of advanced hierarchical models for inferring species trees, such methods have  
 190 yet to be developed for spatially linked gene tree estimation.

191 Here we have demonstrated that the probability of incongruence described by the edge lengths of a  
 192 species tree in coalescent units does not capture the expected spatial similarity of genealogies across chro-  
 193 mosomes. Instead, in addition to the ratio of  $t_g$  to  $N_e$ , which describes the probability of incongruence, it  
 194 becomes necessary to consider the magnitudes of these parameters as well. This presents an interesting  
 195 scenario: imagine a balanced tree with two clades where every edge has the same  $t_c$  edge lengths. In one  
 196 clade these edges are composed of high  $N_e$  and  $t_g$  values, while in the other clade edges have low  $N_e$  and  
 197  $t_g$  values. Despite having the same probability of incongruence, the two clades would exhibit very differ-  
 198 ent rates of change in their topology per unit length spatially across the genome. Unlike in our simulations,  
 199 the rate of decay would likely not be uniform, and would covary more among some edges than others.

200 In theory, this expectation could be built into sliding window analyses based on a parameterized species  
 201 tree inferred from unlinked loci. The simple approach that we implemented here, applying weights to  
 202 alignment windows, is only a first step. A more appropriate direction to focus in the future would be to use  
 203 species tree information to establish tree topology priors in a Bayesian context that could be used to im-  
 204 prove local gene tree estimation by combining both the expected genome-wide distribution of genealogies  
 205 as well as the expected similarity among neighboring genealogies. In contrast to treating recombination as  
 206 a source of error for phylogenetic analyses, this direction of research aims to accommodate recombination  
 207 as a source of historical information. There is no doubt that the MSC will continue to be extended to meet

208 the needs introduced by new types of data, and the many questions that they inspire.

## 209 **References**

- 210 Castillo-Ramirez, S., Liu, L., Pearl, D. & Edwards, S. (2010). Bayesian estimation of species trees: a practical  
211 guide to optimal sampling and analysis. In: *Estimating species trees: practical and theoretical*  
212 *aspects*. Wiley-Blackwell, pp. 15–33. [3](#)
- 213 Degnan, J.H. & Rosenberg, N.A. (2009). Gene tree discordance, phylogenetic inference and the multi-  
214 species coalescent. *Trends in Ecology & Evolution*, 24, 332–340. [1](#)
- 215 Eaton, D.A.R. (2020). Toytree: A minimalist tree visualization and manipulation library for Python. *Meth-*  
216 *ods in Ecology and Evolution*, 11, 187–191. [2](#)
- 217 Edwards, S. & Beerli, P. (2000). Perspective: Gene Divergence, Population Divergence, and the Variance  
218 in Coalescence Time in Phylogeographic Studies. *Evolution*, 54, 1839–1854. [1](#)
- 219 Fang, B., Merilä, J., Matschiner, M. & Momigliano, P. (2020). Estimating uncertainty in divergence times  
220 among three-spined stickleback clades using the multispecies coalescent. *Molecular Phylogenetics and*  
221 *Evolution*, 142, 106646. [1](#), [7](#)
- 222 Guerrero, R.F. & Hahn, M.W. (2018). Quantifying the risk of hemiplasy in phylogenetic inference. *Pro-*  
223 *ceedings of the National Academy of Sciences*, 115, 12787–12792. [1](#), [7](#)
- 224 Hudson, R.R. & Kaplan, N.L. (1988). The coalescent process in models with selection and recombination.  
225 *Genetics*, 120, 831–840. [1](#)
- 226 Kelleher, J., Etheridge, A.M. & McVean, G. (2016). Efficient Coalescent Simulation and Genealogical  
227 Analysis for Large Sample Sizes. *PLOS Computational Biology*, 12, e1004842. [1](#), [2](#)
- 228 Knowles, L.L. & Kubatko, L.S. (2011). *Estimating Species Trees: Practical and Theoretical Aspects*. John  
229 Wiley and Sons. [1](#)
- 230 Maddison, W.P. (1997). Gene Trees in Species Trees. *Systematic Biology*, 46, 523–536. [1](#)
- 231 Maddison, W.P. & Knowles, L.L. (2006). Inferring Phylogeny Despite Incomplete Lineage Sorting. *Sys-*  
232 *tematic Biology*, 55, 21–30. [1](#)
- 233 Martin, S.H. & Belleghem, S.M.V. (2017). Exploring Evolutionary Relationships Across the Genome  
234 Using Topology Weighting. *Genetics*, 206, 429–438. [2](#)
- 235 Martin, S.H., Davey, J.W., Salazar, C. & Jiggins, C.D. (2019). Recombination rate variation shapes barriers  
236 to introgression across butterfly genomes. *PLOS Biology*, 17, e2006288. [7](#)
- 237 McKenzie, P.F. & Eaton, D.A.R. (2020). ipcoal: An interactive Python package for simulating and analyz-  
238 ing genealogies and sequences on a species tree or network. *bioRxiv*, p. 2020.01.15.908236. [2](#)
- 239 McVean, G.A. & Cardin, N.J. (2005). Approximating the coalescent with recombination. *Philosophical*  
240 *Transactions of the Royal Society B: Biological Sciences*, 360, 1387–1393. [1](#)
- 241 Rasmussen, M.D. & Kellis, M. (2012). Unified modeling of gene duplication, loss, and coalescence using  
242 a locus tree. *Genome Research*, 22, 755–765. [1](#)



243 Springer, M.S. & Gatesy, J. (2016). The gene tree delusion. *Molecular Phylogenetics and Evolution*, 94,  
244 1–33. 3

245 Stamatakis, A. (2014). RAxML version 8: a tool for phylogenetic analysis and post-analysis of large phy-  
246 logenies. *Bioinformatics (Oxford, England)*, 30, 1312–1313. 6

247 Wang, J., Street, N.R., Park, E.J., Liu, J. & Ingvarsson, P.K. (2019). Evidence for widespread selection in  
248 shaping the genomic landscape during speciation of *Populus*. *bioRxiv*, p. 819219. 2

249 Yu, Y., Than, C., Degnan, J.H. & Nakhleh, L. (2011). Coalescent Histories on Phylogenetic Networks and  
250 Detection of Hybridization Despite Incomplete Lineage Sorting. *Systematic Biology*, 60, 138–149. 1

## 251 **Acknowledgments**

252 We thank Lacey Knowles and Laura Kubatko for organizing the Estimating Species Trees book volumes  
253 and for inviting us to contribute. This work was supported by a NSF Graduate Research Fellowship to P.  
254 McKenzie and NSF grant DEB 1557059 to D. Eaton.
